# Supplementary material for: Ligand-induced synthesis of two Cu-based coordination polymers and derivation of carbon-coated metal oxide heterojunctions for enhanced photocatalytic degradation
Source: Royal Society of Chemistry journal article supplement (doi:10.1039/d2dt03023c), 2022-01-01
Supplement: d2dt03023c1.pdf [file d2dt03023c1.pdf]

## Supporting Information

### Ligand-induced synthesis of two Cu-based coordination polymers and derived carbon-coated metal oxide heterojunction for enhanced photocatalytic degradation

Xiao-Sa Zhang,<sup>a</sup> Hong-Tian Zhao,<sup>a</sup> Yu Liu,<sup>a</sup> Wen-Ze Li,<sup>a\*</sup> Nan Luo<sup>a</sup> and Jian Luan<sup>b\*</sup>

<sup>a</sup> College of Science, Shenyang University of Chemical Technology, Shenyang, 110142, P. R. China

<sup>b</sup> College of Sciences, Northeastern University, Shenyang, 100819, P. R. China

E-mail: [liwenze@syuct.edu.cn](mailto:liwenze@syuct.edu.cn) (W. Z. Li); [2010044@stu.neu.edu.cn](mailto:2010044@stu.neu.edu.cn) (J. Luan)

**Table S1** Crystallographic data for complexes **1** and **2**.

| Complex                                                         | <b>1</b>                                                        | <b>2</b>                                                        |
|-----------------------------------------------------------------|-----------------------------------------------------------------|-----------------------------------------------------------------|
| Formula                                                         | C <sub>24</sub> H <sub>28</sub> CuN <sub>4</sub> O <sub>6</sub> | C <sub>13</sub> H <sub>15</sub> CuN <sub>2</sub> O <sub>5</sub> |
| Formula wt                                                      | 532.04                                                          | 342.81                                                          |
| Crystal system                                                  | Triclinic                                                       | Triclinic                                                       |
| Space group                                                     | <i>P</i> -1                                                     | <i>P</i> -1                                                     |
| <i>T</i> (K)                                                    | 296(2)                                                          | 296(2)                                                          |
| <i>a</i> (Å)                                                    | 8.273(3)                                                        | 8.4346(7)                                                       |
| <i>b</i> (Å)                                                    | 9.463(3)                                                        | 8.6526(8)                                                       |
| <i>c</i> (Å)                                                    | 16.205(5)                                                       | 11.0134(10)                                                     |
| $\alpha$ (°)                                                    | 98.044(9)                                                       | 69.429(2)                                                       |
| $\beta$ (°)                                                     | 98.914(9)                                                       | 67.606(2)                                                       |
| $\gamma$ (°)                                                    | 100.409(10)                                                     | 74.800(2)                                                       |
| <i>V</i> (Å <sup>3</sup> )                                      | 1214.1(7)                                                       | 688.08(11)                                                      |
| <i>Z</i>                                                        | 2                                                               | 2                                                               |
| <i>D</i> <sub>calc</sub> (g cm <sup>-3</sup> )                  | 1.455                                                           | 1.655                                                           |
| <i>F</i> (000)                                                  | 554                                                             | 352                                                             |
| $\theta$ <sub>max</sub> (°)                                     | 25.14                                                           | 28.05                                                           |
| <i>R</i> <sub>int</sub>                                         | 0.0774                                                          | 0.0186                                                          |
| <i>R</i> <sub>1</sub> <sup>a</sup> [ <i>I</i> > 2σ( <i>I</i> )] | 0.0599                                                          | 0.0354                                                          |
| w <i>R</i> <sub>2</sub> <sup>b</sup> (all data)                 | 0.1745                                                          | 0.0845                                                          |
| GOF                                                             | 1.002                                                           | 1.043                                                           |

<sup>a</sup>  $R_1 = \Sigma||F_o| - |F_c|| / \Sigma|F_o|$ , <sup>b</sup>  $wR_2 = \Sigma[w(F_o^2 - F_c^2)^2] / \Sigma[w(F_o^2)]^{1/2}$ .

**Table S2** Selected bond distances (Å) and angles (°) for complex **1**.

|                         |            |                          |            |
|-------------------------|------------|--------------------------|------------|
| Cu(1) – O(1)            | 1.953(4)   | Cu(1) – O(3)#3           | 1.969(4)   |
| Cu(1) – O(4)#1          | 1.958(4)   | Cu(1) – N(1)             | 2.179(4)   |
| Cu(1) – O(2)#2          | 1.969(4)   | Cu(1) – Cu(1)#2          | 2.6379(14) |
| O(1) – Cu(1) – O(4)#1   | 89.17(18)  | O(2)#2 – Cu(1) – N(1)    | 90.28(16)  |
| O(1) – Cu(1) – O(2)#2   | 167.98(14) | O(3)#3 – Cu(1) – N(1)    | 89.97(16)  |
| O(4)#1 – Cu(1) – O(2)#2 | 88.82(17)  | O(1) – Cu(1) – Cu(1)#2   | 85.76(11)  |
| O(1) – Cu(1) – O(3)#3   | 90.95(17)  | O(4)#1 – Cu(1) – Cu(1)#2 | 86.19(11)  |
| O(4)#1 – Cu(1) – O(3)#3 | 167.98(14) | O(2)#2 – Cu(1) – Cu(1)#2 | 82.28(11)  |
| O(2)#2 – Cu(1) – O(3)#3 | 88.56(17)  | O(3)#3 – Cu(1) – Cu(1)#2 | 81.83(11)  |
| O(1) – Cu(1) – N(1)     | 101.73(16) | N(1) – Cu(1) – Cu(1)#2   | 169.03(12) |
| O(4)#1 – Cu(1) – N(1)   | 101.77(16) |                          |            |

Symmetry codes: #1  $x - 1, y, z$ ; #2  $-x, -y + 1, -z + 2$ ; #3  $-x + 1, -y + 1, -z + 2$ .

**Table S3** Selected bond distances (Å) and angles (°) for complex **2**.

|                         |            |                          |            |
|-------------------------|------------|--------------------------|------------|
| Cu(1) – O(1)            | 1.9641(18) | Cu(1) – O(2)#3           | 1.9841(18) |
| Cu(1) – O(4)#1          | 1.9676(16) | Cu(1) – N(1)             | 2.2059(19) |
| Cu(1) – O(3)#2          | 1.9696(16) | Cu(1) – Cu(1)#3          | 2.6433(6)  |
| O(1) – Cu(1) – O(4)#1   | 90.09(8)   | O(3)#2 – Cu(1) – N(1)    | 100.02(7)  |
| O(1) – Cu(1) – O(3)#2   | 89.63(8)   | O(2)#3 – Cu(1) – N(1)    | 95.78(7)   |
| O(4)#1 – Cu(1) – O(3)#2 | 167.74(7)  | O(1) – Cu(1) – Cu(1)#3   | 82.25(5)   |
| O(1) – Cu(1) – O(2)#3   | 167.99(7)  | O(4)#1 – Cu(1) – Cu(1)#3 | 77.64(5)   |

|                         |          |                          |           |
|-------------------------|----------|--------------------------|-----------|
| O(4)#1 - Cu(1) - O(2)#3 | 88.33(8) | O(3)#2 - Cu(1) - Cu(1)#3 | 90.18(5)  |
| O(3)#2 - Cu(1) - O(2)#3 | 89.40(8) | O(2)#3 - Cu(1) - Cu(1)#3 | 85.78(5)  |
| O(1) - Cu(1) - N(1)     | 96.17(7) | N(1) - Cu(1) - Cu(1)#3   | 169.68(6) |
| O(4)#1 - Cu(1) - N(1)   | 92.19(7) |                          |           |

Symmetry codes: #1  $x + 1, y, z$ ; #2  $-x, -y + 1, -z + 1$ ; #3  $-x + 1, -y + 1, -z + 1$ .

**Table S4** BET surface area and adsorption average pore width for complexes **1** and **2** and the carbon-coated metal oxide heterojunctions.

| Material         | BET surface area (m <sup>2</sup> g <sup>-1</sup> ) | Adsorption average pore width (nm) |
|------------------|----------------------------------------------------|------------------------------------|
| Complex <b>1</b> | 0.323                                              | 55.35                              |
| <b>Cu@V-1</b>    | 3.755                                              | 105.65                             |
| <b>Cu@Mo-1</b>   | 4.454                                              | 26.66                              |
| <b>Cu@W-1</b>    | 4.465                                              | 7.85                               |
| Complex <b>2</b> | 1.908                                              | 552.08                             |
| <b>Cu@V-2</b>    | 18.394                                             | 6.53                               |
| <b>Cu@Mo-2</b>   | 84.181                                             | 15.36                              |
| <b>Cu@W-2</b>    | 58.415                                             | 19.44                              |

**Table S5** Organic dyes with different charge types and sizes.

| Dye                    | Formula                                                                             | Charge type | Size (nm × nm × nm) |
|------------------------|-------------------------------------------------------------------------------------|-------------|---------------------|
| Methylene Blue<br>(MB) | 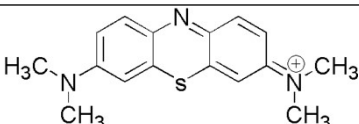 | Cationic    | 0.40 × 0.79 × 1.63  |
| Rhodamine B<br>(RhB)   |  | Cationic    | 0.68 × 1.18 × 1.57  |
| Methyl Orange<br>(MO)  |  | Anionic     | 0.53 × 0.73 × 1.74  |

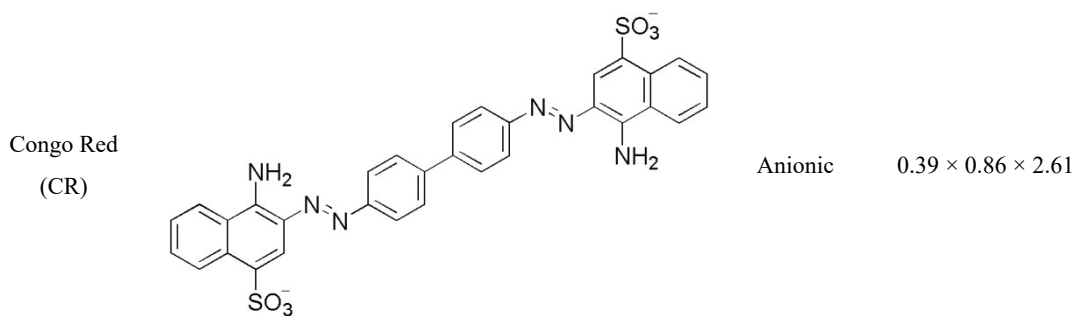

**Table S6** Pseudo-first-order and pseudo-second-order kinetic parameters for the photodegradation of dyes by **Cu@Mo-2**.

| Dye | Concentration (mg L <sup>-1</sup> ) | Rate constant (K min <sup>-1</sup> ) | Half-life t <sub>1/2</sub> (min) | R <sup>2</sup> |
|-----|-------------------------------------|--------------------------------------|----------------------------------|----------------|
| MB  | 10                                  | 0.0115                               | 60.27                            | 0.8563         |
| RhB | 10                                  | 0.0057                               | 121.60                           | 0.9692         |
| MO  | 40                                  | 0.0029                               | 239.02                           | 0.9891         |
| CR  | 80                                  | 0.0081                               | 85.57                            | 0.9892         |

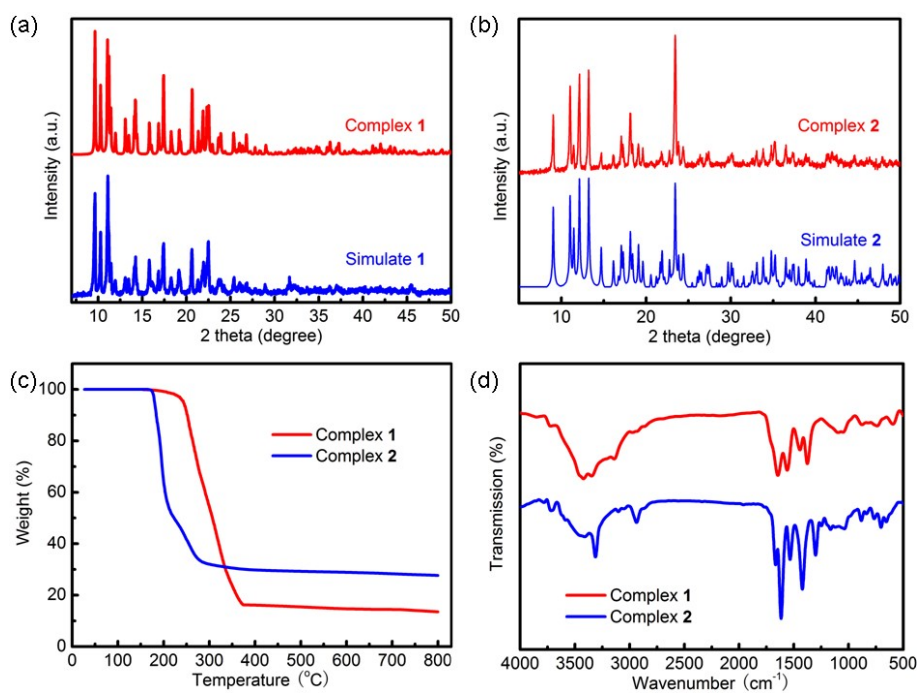

**Fig. S1** (a) The PXRD patterns of simulated and fresh sample for complex **1**; (b) The PXRD patterns of simulated and fresh sample for complex **2**; (c) The TG curve of complexes **1** and **2**; (d) The IR spectra of complexes **1** and **2**.

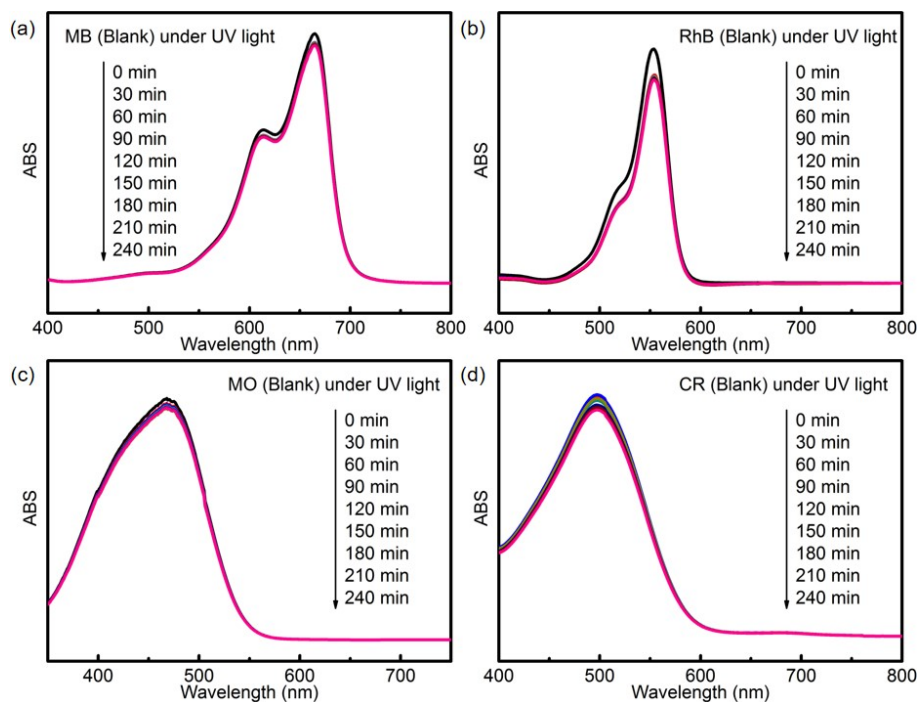

**Fig. S2** UV-vis spectra of blank experiment for dye photocatalysis (performed in the absence of any catalyst).

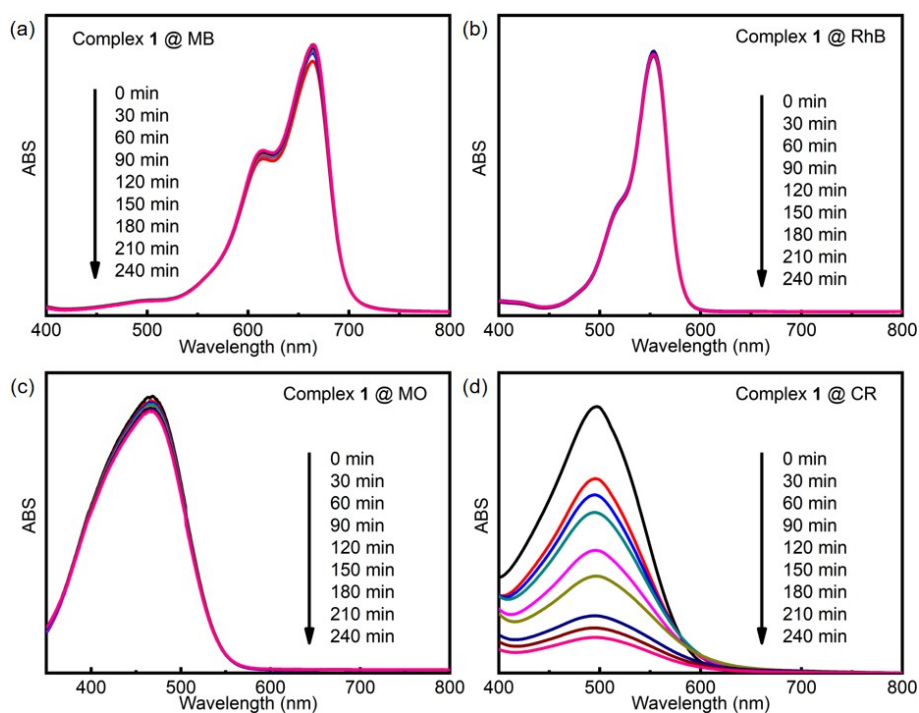

**Fig. S3** UV-vis spectra of MB (a), RhB (b), MO (c) and CR (d) solutions recorded after different adsorption times with complex 1.

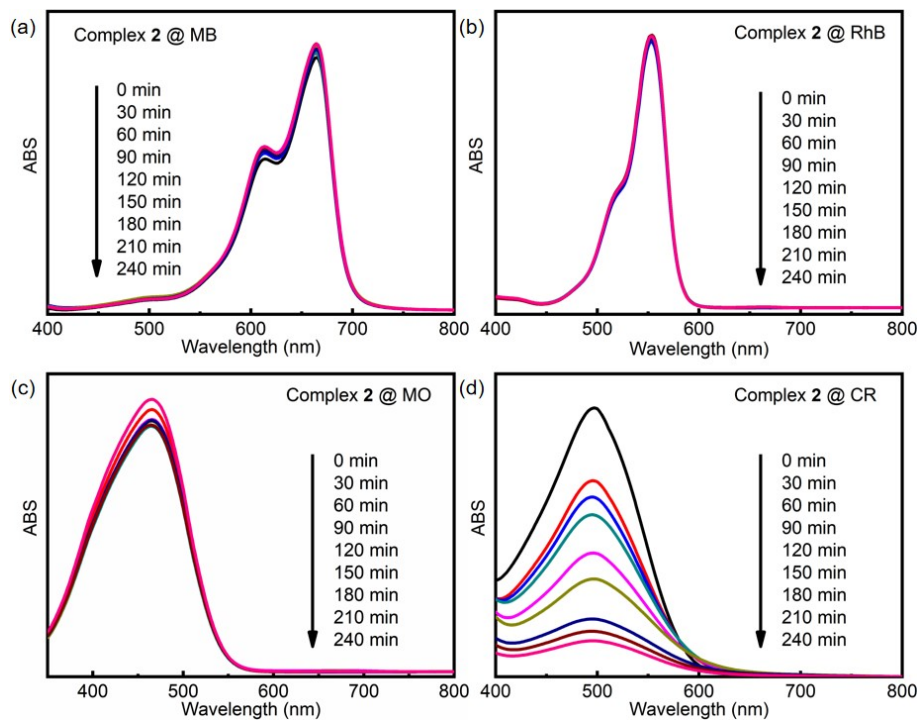

**Fig. S4** UV-vis spectra of MB (a), RhB (b), MO (c) and CR (d) solutions recorded after different adsorption times with complex 2.

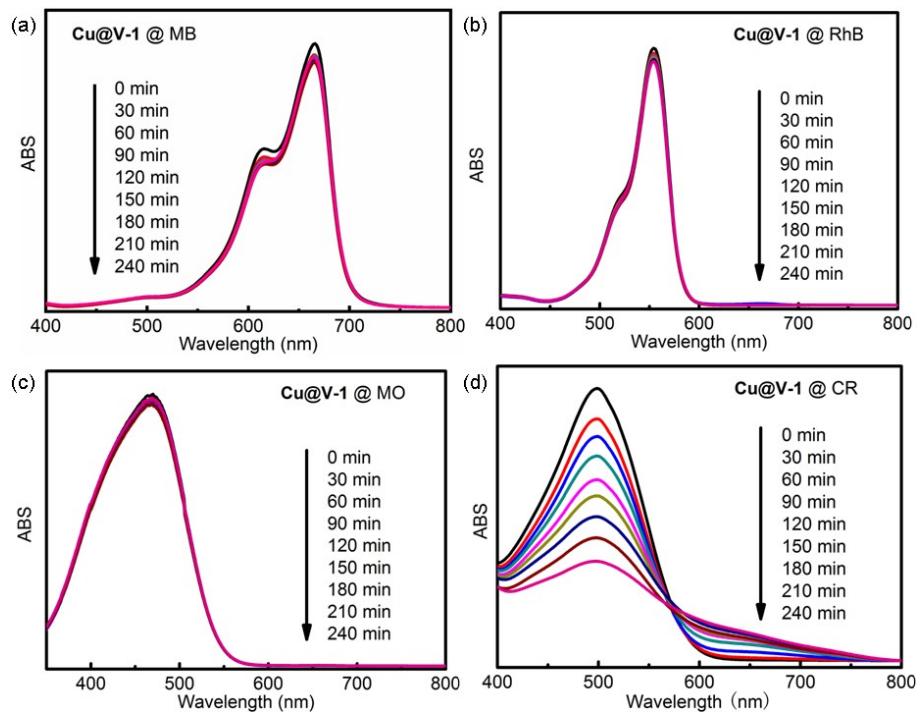

**Fig. S5** UV-vis spectra of MB (a), RhB (b), MO (c) and CR (d) solutions recorded after different adsorption times with Cu@V-1.

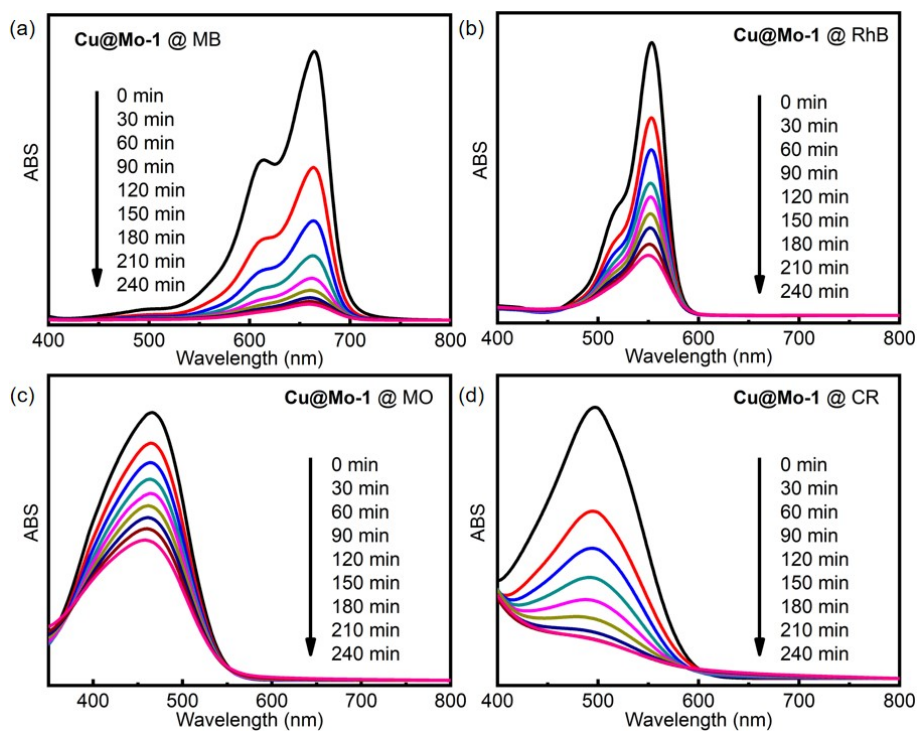

**Fig. S6** UV-vis spectra of MB (a), RhB (b), MO (c) and CR (d) solutions recorded after different adsorption times with **Cu@Mo-1**.

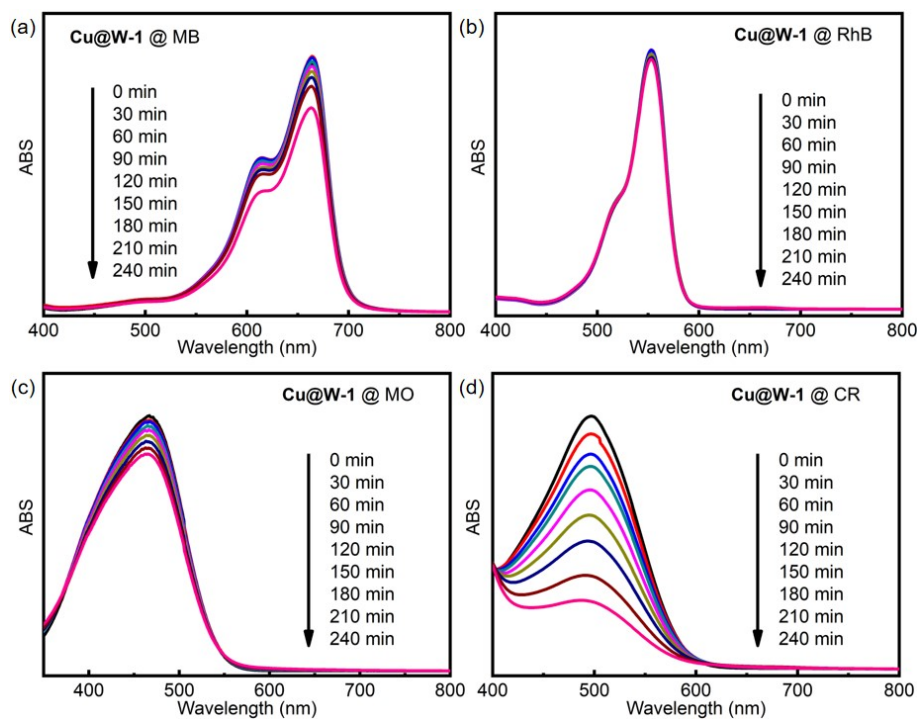

**Fig. S7** UV-vis spectra of MB (a), RhB (b), MO (c) and CR (d) solutions recorded after different adsorption times with **Cu@W-1**.

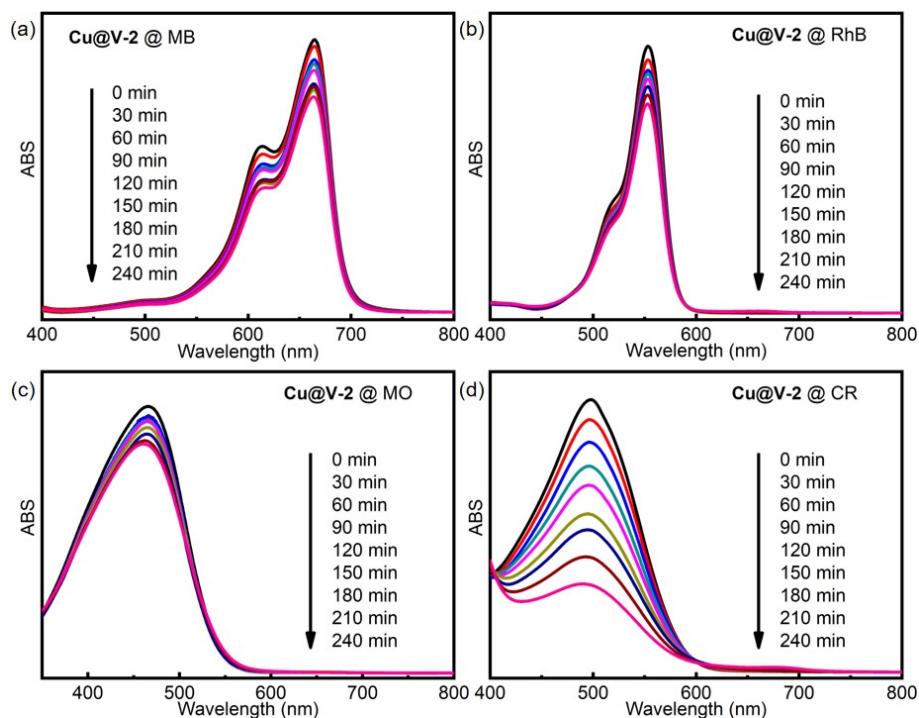

**Fig. S8** UV-vis spectra of MB (a), RhB (b), MO (c) and CR (d) solutions recorded after different adsorption times with **Cu@V-2**.

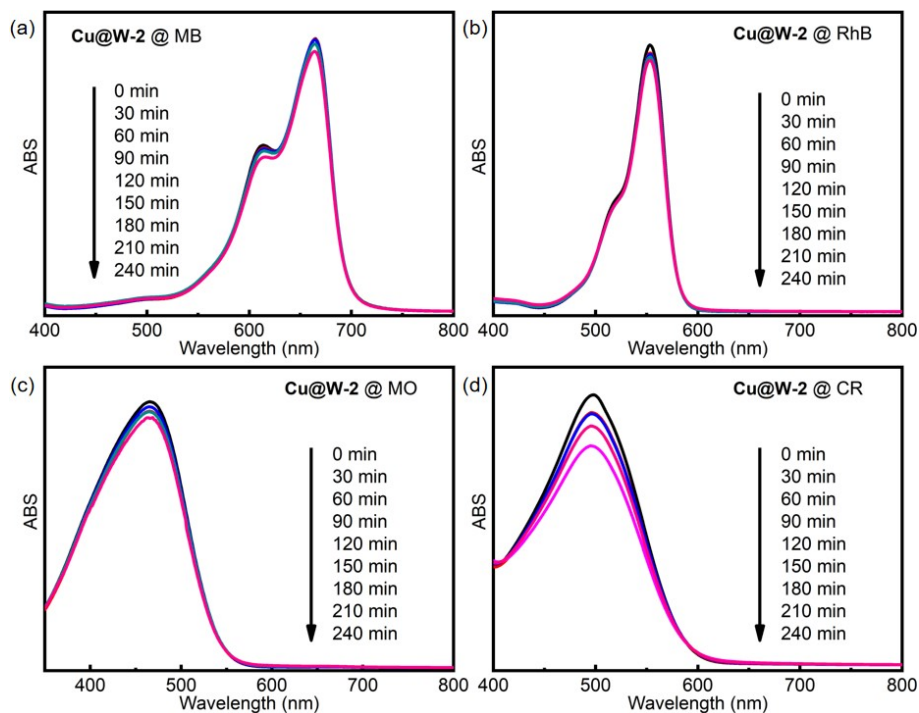

**Fig. S9** UV-vis spectra of MB (a), RhB (b), MO (c) and CR (d) solutions recorded after different adsorption times with **Cu@W-2**.



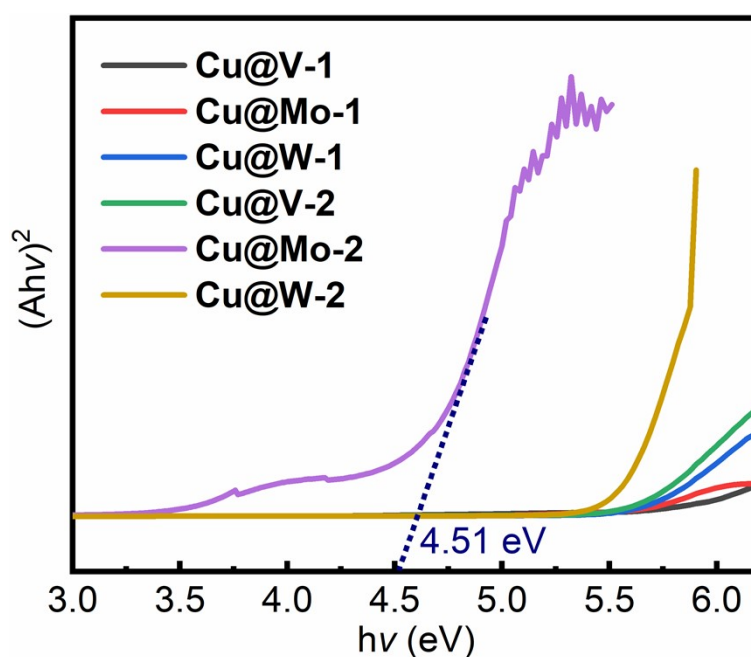

**Fig. S10** Tauc's plots of the carbon-coated metal oxide heterojunctions.

### S1. Pseudo-first-order kinetics.

These calculations were performed via equations (S1) and (S2):

$$\ln(C_0/C_t) = kt \quad (\text{S1})$$

$$t_{1/2} = \frac{\ln 2}{k} \quad (\text{S2})$$

where  $C_0$  represents the initial concentration of dye ( $\text{mg L}^{-1}$ ),  $C_t$  is the residual concentration of dye at time  $t$  (min),  $k$  denotes the pseudo-first-order rate constant ( $\text{min}^{-1}$ ), and  $t_{1/2}$ (min) represents the half-life period of the reaction.

### S2. Pseudo-second-order kinetics.

These calculations were performed via equations (S3):

$$t/C_t = 1/(kC_t^2) + t/C_0 \quad (\text{S3})$$

where  $C_0$  represents the initial concentration of dye,  $C_t$  is the residual concentration of dye at time  $t$  (min), and  $k$  denotes the pseudo-second-order rate constant ( $\text{L mg}^{-1} \text{min}^{-1}$ ).

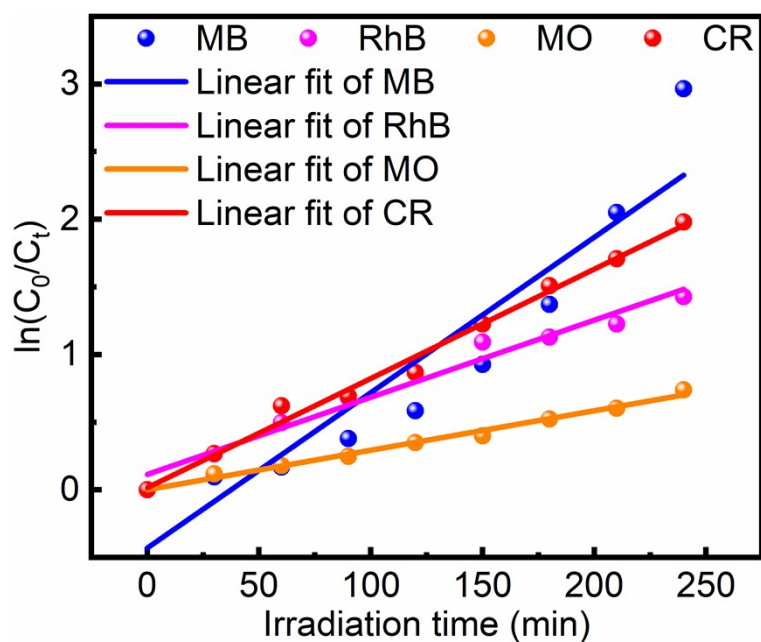

**Fig. S11** Pseudo-first-order plots with respect to time for **Cu@Mo-2** in aqueous dye solutions.

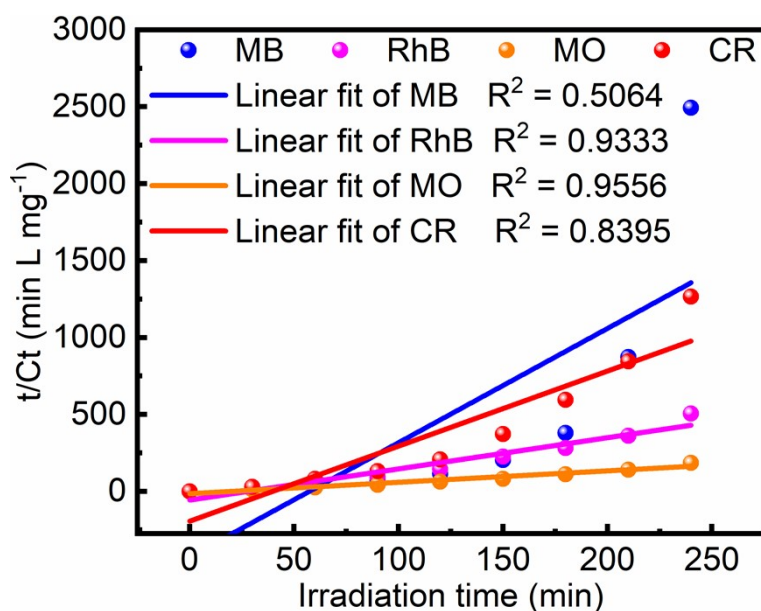

**Fig. S12** Pseudo-second-order plots with respect to time for **Cu@Mo-2** in aqueous dye solutions.

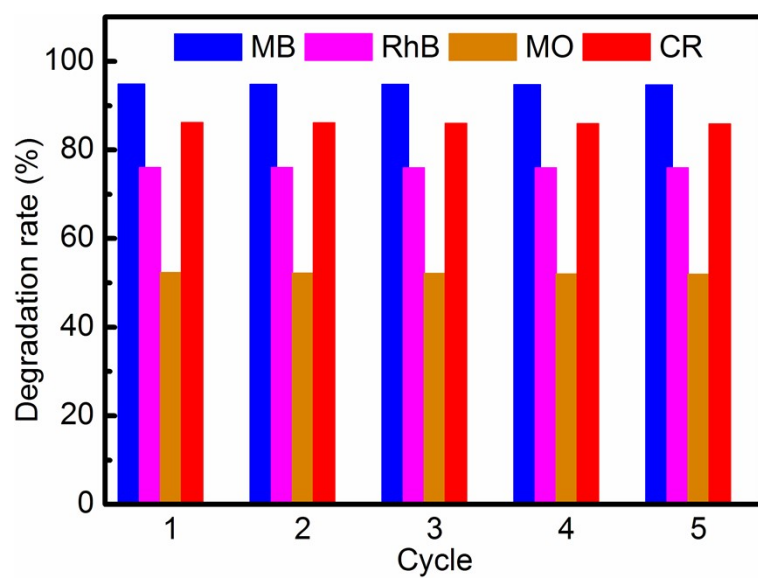

**Fig. S13** The reproducibility of the photocatalyst **Cu@Mo-2** for dyes.
